# Supplementary material
Source: publisher figshare collection journal article supplement (https://tandf.figshare.com/articles/dataset/_/5873139)
Supplement: Supplementary file 1 [file 1]

### Supplementary material: Sample data for synthetic data experiment

The supplementary material shows one of the 10 datasets with datasize = 5000, clustered objectives and dispersed resources. The explanation of experiment settings for various experiment groups can be found in Table 4 of the main manuscript.

Out of the dataset in a zip file, the file `raw_coordinates.csv` contains the raw coordinates of spatial points. The file contains six columns: `objective_x`, `objective_y`, `resource1_x`, `resource1_y`, `resource2_x` and `resource2_y`, for the (x, y) coordinates of 5000 objective, resource1 and resource2 points, respectively. Part of the data is shown in Figure Supp1.

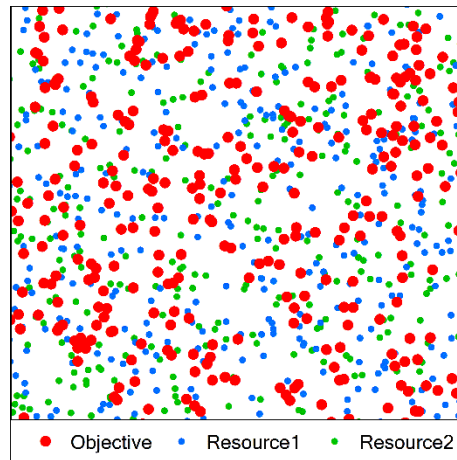

Figure Supp1. Plot of part of dataset, with  $(x, y) = (0, 0)$  in the lower-left.

The other six files contain the complete data for experiment groups with different combinations of extraneous factors (0, 10%, 20%) and ‘true’ membership functions for

near1/near2 with respect to their raw values (linear, Gaussian-curve). Attributes in each of the six files are listed in Table Supp1.

Table Supp1. Attributes in complete data files.

| Column | Attribute name                                                                              | Description                                                                                                                                                                                   |
|--------|---------------------------------------------------------------------------------------------|-----------------------------------------------------------------------------------------------------------------------------------------------------------------------------------------------|
| 1–4    | acc_res1_near_C, acc_res1_far_C,<br>acc_res2_near_C, acc_res2_far_C                         | $\mu_Y(\text{near1})$ , $\mu_Y(\text{near1})$ , $\mu_N(\text{near2})$<br>and $\mu_N(\text{near2})$ , for experiment                                                                           |
| 5–8    | acc_res1_near_G, acc_res1_far_G,<br>acc_res2_near_G, acc_res2_far_G                         | group with ‘perceived’ memberships<br>= crisp (C, 0 and 1 values only),                                                                                                                       |
| 9–12   | acc_res1_near_L, acc_res1_far_L,<br>acc_res2_near_L, acc_res2_far_L                         | Gaussian-curve (G), and linear (L)                                                                                                                                                            |
| 13–16  | other1_0 ~ other1_3                                                                         | Expressing categorical attribute<br>values; same values for group with<br>any ‘perceived’ memberships; e.g.<br>for an objective, if other1=0, then<br>other1_0=1 and other1_0 ~<br>other1_3=0 |
| 17–26  | other2_0 ~ other2_9                                                                         |                                                                                                                                                                                               |
| 27–42  | noise1_0 ~ noise1_3,<br>noise2_0 ~ noise2_3,<br>noise3_0 ~ noise3_3,<br>noise4_0 ~ noise4_3 |                                                                                                                                                                                               |
| 43–44  | outcome_good_C, outcome_bad_C                                                               | $\mu_{\text{good}}(\text{outcome})$ and $\mu_{\text{bad}}(\text{outcome})$                                                                                                                    |
| 45–46  | outcome_good_G, outcome_bad_G                                                               | for experiment group with                                                                                                                                                                     |
| 47–48  | outcome_good_L, outcome_bad_L                                                               | ‘perceived’ memberships = crisp,<br>Gaussian-curve, and linear                                                                                                                                |

Users need to select the corresponding complete data file and columns to run different experiment groups. For example, to run the group with 10% extraneous factors, Gaussian-curve ‘true’ membership functions, and linear ‘perceived’ memberships for evaluating RIMs, use columns 9–12, 13–42 and 47–48 in data\_realGaus\_exfactor10.csv.
